# Supplementary material for: Nanocrystal facet modulation to enhance transferrin binding and cellular delivery
Source: PubMed Central journal article supplement (PMC7062909; doi:10.1038/s41467-020-14972-z), 2020-03-09
Supplement: 41467_2020_14972_MOESM1_ESM.pdf [file 41467_2020_14972_MOESM1_ESM.pdf]

Supplementary Information for

Nanocrystal Facet Modulation to Enhance Transferrin  
Binding and Cellular Delivery

By Qi *et al.*

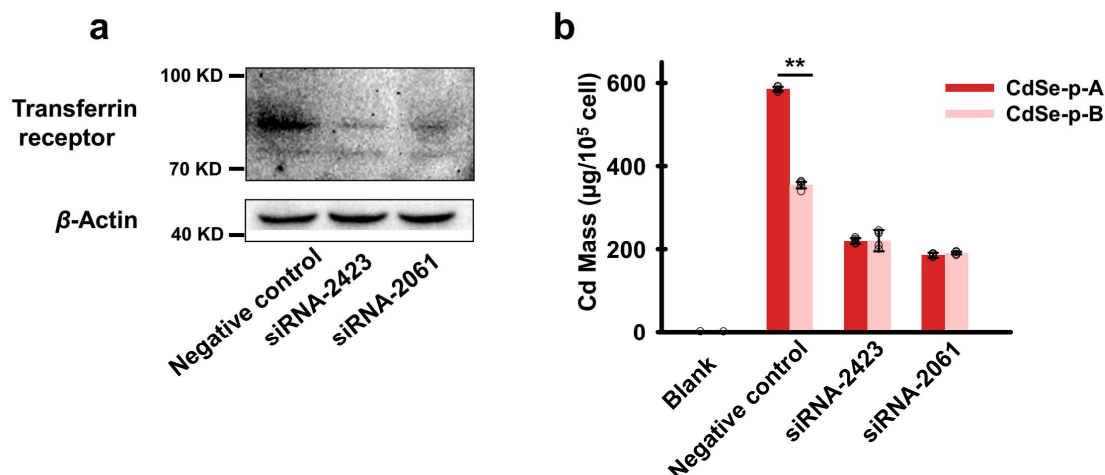

**Supplementary Figure 1.** (a) Expression of transferrin receptors of HeLa cells transfected by negative control, siRNA-2423 and siRNA-2061, showing that both siRNA-2423 and siRNA-2061 down-regulated the expression of transferrin receptor. Expression of transferrin receptor was independently repeated three times and the results were similar. (b) Cellular content of Cd after the transfected HeLa cells exposed to  $40 \mu\text{g mL}^{-1}$  CdSe nanoparticles for 3 h (CdSe-p-A: dark red bar; CdSe-p-B: light red bar). Data are presented as mean  $\pm$  SD of five replicate samples by one-way ANOVA ( $n = 5$ ;  $p < 0.0001$  for negative control, and  $p = 0.5824$  and  $0.1776$  for siRNA-2423 and siRNA-2061, respectively). Statistical significance between groups: (\*\*) $p < 0.01$ . Source data are provided as a Source Data file.

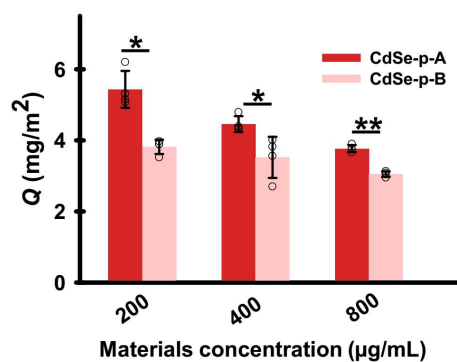

**Supplementary Figure 2.** The amount of bovine serum albumin adsorbed on different-faceted CdSe nanoparticles. The initial protein concentration was  $100 \mu\text{g mL}^{-1}$  (CdSe-p-A: dark red bar; CdSe-p-B: light red bar). Data are presented as mean  $\pm$  SD of four replicate samples by one-way ANOVA ( $n = 4$ ;  $p = 0.0208$ ,  $0.0355$  and  $0.0009$  for 200, 400 and 800  $\mu\text{g/mL}$  CdSe nanoparticles, respectively). Statistical significance between groups: (\*\*)  $p < 0.01$ ; (\*)  $p < 0.05$ . Source data are provided as a Source Data file.

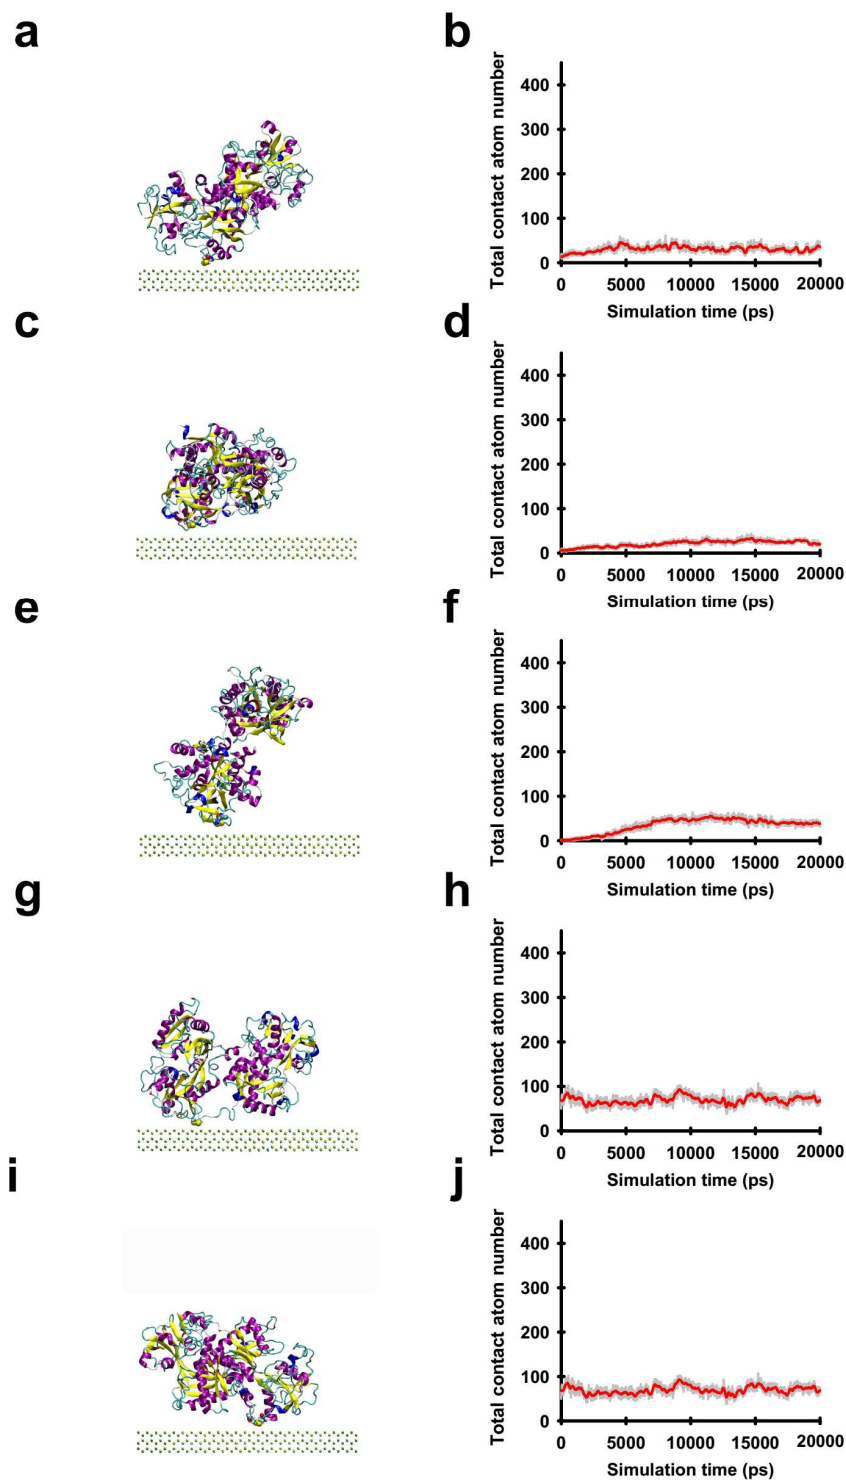

**Supplementary Figure 3.** Molecular dynamics (MD) simulations of interaction between transferrin and CdSe (100) surface. Different molecule models (a, c, e, g and i) and the corresponding contact atom number (b, d, f, h and j) of transferrin adsorbed on the CdSe (100) facet, calculated by MD simulations. Source data are provided as a Source Data file.

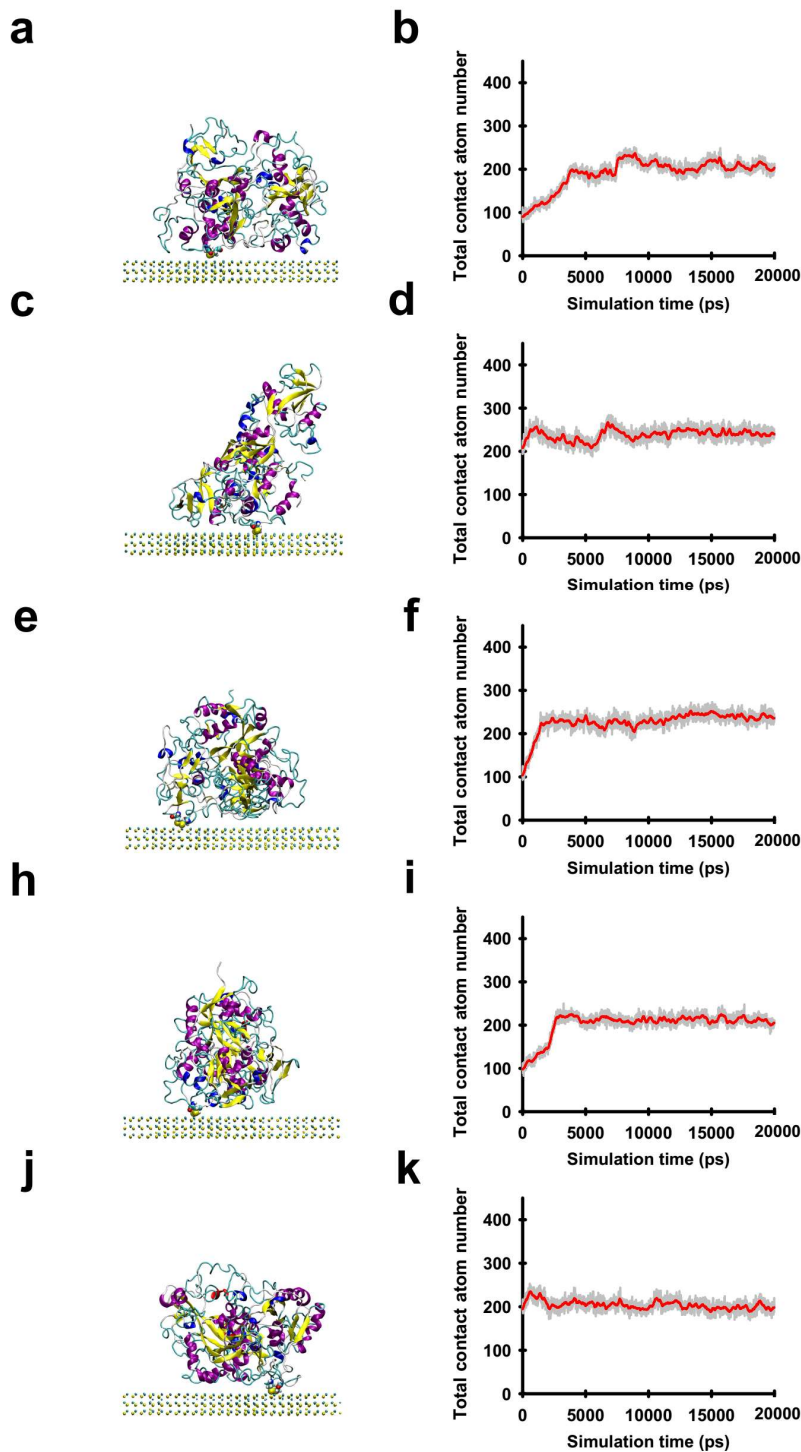

**Supplementary Figure 4.** Molecular dynamics (MD) simulation of interaction between transferrin and CdSe (002) surface. Different molecule models (a, c, e, g and i) and the corresponding contact atom number (b, d, f, h and j) of transferrin adsorbed on the CdSe (002) facet, calculated by MD simulations. Source data are provided as a Source Data file.

**Supplementary Table 1. Selected physicochemical properties of CdSe/CdS nanomaterials**

| Materials | $D_h$ in DI water (nm)    | $D_h$ in PBS with FBS (nm)  | $\zeta$ potential in DI water (mV) <sup>a</sup> | $\zeta$ potential in PBS with FBS (mV) <sup>a</sup> | Surface area (m <sup>2</sup> g <sup>-1</sup> ) <sup>b</sup> |
|-----------|---------------------------|-----------------------------|-------------------------------------------------|-----------------------------------------------------|-------------------------------------------------------------|
| CdSe-p-A  | 639.2 ± 10.7 <sup>a</sup> | 1782.6 ± 107.6 <sup>a</sup> | -14.8 ± 0.1                                     | -20.4 ± 0.4                                         | 22.1                                                        |
| CdSe-p-B  | 638.4 ± 31.4 <sup>a</sup> | 1743.0 ± 215.1 <sup>a</sup> | -17.2 ± 0.4                                     | -20.3 ± 0.8                                         | 21.2                                                        |
| CdSe-r-A  | 707.2 ± 21.8 <sup>a</sup> | 1047.0, 1132.0 <sup>c</sup> | -29.5 ± 0.7                                     | -24.5 ± 0.3                                         | 8.2                                                         |
| CdSe-r-B  | 835.4, 863.0 <sup>c</sup> | 1121, 1486 <sup>c</sup>     | -26.3 ± 3.6                                     | -25.1 ± 0.7                                         | 6.0                                                         |
| CdS-r-A   | 617.6, 540.6 <sup>c</sup> | 890.8, 1078.0 <sup>c</sup>  | -17.2 ± 0.9                                     | -23.2 ± 0.4                                         | 45.7                                                        |
| CdS-r-B   | 669.2, 659.2 <sup>c</sup> | 847.3, 947.9 <sup>c</sup>   | -17.6 ± 0.2                                     | -24.7 ± 0.4                                         | 30.1                                                        |

<sup>a</sup> Data are presented as mean ± SD of triplicate samples by one-way ANOVA (n = 3).

<sup>b</sup> Surface area was quantified as Brunauer-Emmett-Teller (BET) specific surface area.

<sup>c</sup> Measurements of duplicate samples are presented (n = 2).

**Supplementary Table 2. Parameters and components for SC-ICP-MS analysis**

| Parameter/Component                      | Value                                     |
|------------------------------------------|-------------------------------------------|
| Nebulizer                                | MEINHARD® High Efficiency Nebulizer (HEN) |
| Spray Chamber                            | Asperon                                   |
| Make up Gas (L min <sup>-1</sup> )       | 0.7                                       |
| Neb Gas (L min <sup>-1</sup> )           | 0.54                                      |
| Plasma Power (W)                         | 1600                                      |
| Sample Flow Rate (μL min <sup>-1</sup> ) | 10                                        |
| Autosampler                              | Single Cell Micro DX                      |
| Agitation                                | Single Cell Micro DX Autosampler          |
| Sample Loop (μL)                         | 50                                        |

### Supplementary Table 3. Information for expression of non-thiol transferrin mutant

|                                           |                   |
|-------------------------------------------|-------------------|
| Gene name                                 | Transferrin (mut) |
| Plasmid                                   | pET30a            |
| Length of DNA fragments (bp) <sup>a</sup> | 2106              |
| Bacterial strain                          | BL21              |
| Upstream restriction site                 | EcoR I            |
| Downstream restriction site               | Xho I             |
| Mass of protein (kD)                      | 84                |
| Tag                                       | HIS               |

<sup>a</sup> Gene sequence:

```
GAATTCATGCGTCTGGCTGTTGGGGCTCTGCTGGTGGTGCAGTTCTGGGTCTGGGTCTGGCAGTACCGGATAAAAC
CGTTCGTTGGGGCGCAGTTTCTGAACACGAAGCAACCAAGGCCAGAGTTTCCGCGATCACATGAAAAGCGTCATT
CCGTCTGATGGTCCGTCTGTTGCAGGCGTTAAAAAAGCAAGCTATCTGGACGGTATTCGCGCAATTGCAGCAAACGA
AGCAGACGCTGTTACCCTGGATGCAGGTCTGGTTACGACGCATATCTGGCACCGAATAACCTGAAACCGGTAGTTG
CGGAATTTTACGGCAGCAAAGAAGATCCGCAGACCTTTTATTACGCGGTTGCGGTTGTCAAAAAAGACTCCGGCTTC
CAGATGAACCAGCTGCGCGGTAAAAAATCTGGTCATACCGGTCTGGGTCTGTTCTGCTGGCTGGAATATTCGATTGG
TCTGCTGTACGGCGATCTGCCGGAACCGCGTAAACCGCTGGAAAAAGCAGTTGCGAACTTTTTCTCTGGTCTGGC
GCACCGGGCGCAGACGGTACCGATTTTCCGCAACTGGGTCAACTGGGTCCGGGTGGCGGGCGGTAGTACCCTGAATC
AGTATTTTGGCTACAGCGGGCGCATTTAAAGGTCTGAAAGACGGGCGCTGGCGACGTTGCGTCAAAACACAGCAC
CATCTTCGAAAACCTGGCGAACAAAGCAGATCGCGATCAGTACGAACTGCTGGGTCTGGATAACACCCGTAAACCG
GTTGACGAGTACAAAGACGGTCATCTGGCACAAGTTCGAGTCATACCGTGTGCTCGTAGTATGGGGGGTAAAGA
GGATCTGATCTGGGAACTGCTGAATCAGGCACAGGAACACTTCGGCAAAGACAAAAGCAAAGAGTCCAGCTGTTT
AGTAGCCCGCACGGTAAAGATCTGCTGTTCAAAGATTCCGCACACGGTTTTCTGAAAAGTCCGCCCGCTATGGACGC
AAAAATGTACCTGGGCTACGAGTACGTCACCGCAATTCGTAATCTGCGCGAAGGTACCGGTCCGGAAGCACCGACC
GACGAAGGTAAACCGGTTAAATGGGGCGCACTGAGTCATCACGAACGCTGAAAGGGCAGGAGTGGTCTGTTAAC
AGCGTTGGCAAATTGAAGGCGTTAGCGCAGAAACCACCGAAGACGGTATCGCCAAAATCATGAACGGCGAAGCT
GACGCAATGAGTCTGGACGGCGGCTTTGTTTATATTGCCGGCAAAGGCGGTCTGGTTCGGTCTGGCAGAAAATTA
CAACAAAAGCGACAACGGCGAAGACACCCCGGAAGCAGGTTATTTTTCGATTGCGGTTGTCAAAAAATCCGCAAG
CGATCTGACCTGGGACAACCTGAAAGGCAAAAAATCCGGCCATACCGCAGTAGGTTCGTACCGCAGGTTGGAATATT
CCGATGGGCCTGCTGTACAACAAAATCAACCACGGCCGCTTCGACGAATTTTCAGCGAAGGCGGCGCACCGGGTA
GTAAAAAAGATAGTAGTCTGGGCAAACCTGGGTATGGTCTGTTCTGAACTGCGGCGAACCGAACAACAAGAAGG
CTATTACGGCTATACCGGCGCATTTGCGGGTCTGGTTGAAAAAGGCGACGTTGCATTTCGTCAAACATCAGACCGTCC
CGCAGAATACCGGCGGTAAAAATCCGGATCCGTGGGCAAAAAACCTGAACGAGAAAAGACTACGAACTGCTGGGTC
TGGACGGTACCCGTAAACCGGTTGAAGAATACGCAAACGGTCATCTGGCACGCGCACCGAATCACGCAGTTGTTAC
CCGTAAAGACAAAAGAAGCGGGCGTTCAAAAATCCTGCGTCAACAGCAGCACCTGTTTGGTAGCAACGTAACCGA
CGGTTCTGGTAACTTTGGTCTGTTCCGCAGCGAAACCAAAGATCTGCTGTTCCGTGACGATACCGTTGGTCTGGCAA
AACTGCACGATCGCAACACCTACGAGAAATACCTGGGCGAAGAATACGTCAAAGCGGTTGGTAACTGCGTAAAGG
TTTACCAGTTCTCTGCTGGAAGCAGGTACCTTTCTGTCGTCGCTCGAG
```
